# Supplementary material for: Coping with the mental health impact of COVID–19: A study protocol for a multinational longitudinal study on coping and resilience during the COVID-19 pandemic
Source: PubMed Central journal article supplement (PMC10194934; doi:10.1371/journal.pone.0285803), 2023-05-18
Supplement: pone.0285803.s002.pdf [file pone.0285803.s002.pdf]

HS Emden/Leer ■ Constantiaplatz 4 ■ 26723 Emden

Frau Prof.  
Dr. Jutta Lindert  
FB Soziale Arbeit und Gesundheit

**Auskunft erteilt**

Name: Prof. Dr. Sven Steinigeweg  
E-Mail: [vp.forschung-transfer@hs-emden-leer.de](mailto:vp.forschung-transfer@hs-emden-leer.de)  
Tel.: 04921/807-1007  
Fax: 04921/807-1003

Ihr Zeichen  
Ihre Nachricht (Datum)

(Bei Antwort angeben)  
Mein Zeichen  
st

Emden, 1. Oktober 2020

**Genehmigung Ihres Antrags „COPERS“**

Sehr geehrte Frau Prof. Lindert,

gerne teile ich Ihnen mit, dass die Kommission für Folgenabschätzung und Ethik Ihren Antrag genehmigt hat.

Ich wünsche Ihrem Vorhaben viel Erfolg und verbleibe mit freundlichen Grüßen



Prof. Dr. Sven Steinigeweg  
Vizepräsident für Forschung und Wissenstransfer
