# Supplementary material for: Coping with the mental health impact of COVID–19: A study protocol for a multinational longitudinal study on coping and resilience during the COVID-19 pandemic
Source: PubMed Central journal article supplement (PMC10194934; doi:10.1371/journal.pone.0285803), 2023-05-18
Supplement: pone.0285803.s004.pdf [file pone.0285803.s004.pdf]

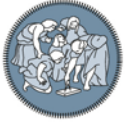

**POLITECNICO**  
MILANO 1863

Milan, on 12/11/2020

Opinion n. 31/2020

RESEARCH SERVICE  
RESEARCH AND  
INNOVATION

OBJECT: Research Ethical Committee Opinion. Project: "*Coping with COVID*" (*COPERS*). Scientific coordinator: Prof. Stefano Capolongo.

**The Research Ethical Committee,**

- given the request for opinion of 02/11/2020 concerning the aforementioned project;
- given the audit of the meeting of 05/11/2020;
- examined all documents;

issues the following opinion:

**POSITIVE**

The President  
(Prof. Carlo Ghezzi)
